# Supplementary material for: The CH(X2Π) + H2O reaction: two transition state kinetics
Source: Royal Society of Chemistry journal article supplement (doi:10.1039/d1cp02234b), 2021-01-01
Supplement: d1cp02234b1.pdf [file d1cp02234b1.pdf]

## \*\*\*Supplementary Material\*\*\*

### The CH(X<sup>2</sup>Π) + H<sub>2</sub>O Reaction: Two Transition State Kinetics

Thanh Lam Nguyen<sup>1\*</sup> and Jozef Peeters<sup>2\*</sup>

<sup>1</sup>Quantum Theory Project, Department of Chemistry and Physics, University of Florida, Gainesville, FL, 32611, USA.

<sup>2</sup>Department of Chemistry, University of Leuven, Celestijnenlaan 200F, B-3001 Heverlee, Belgium.

\*Corresponding authors: [tlam.nguyen@chem.ufl.edu](mailto:tlam.nguyen@chem.ufl.edu) and [jozef.peeters@kuleuven.be](mailto:jozef.peeters@kuleuven.be)

#### **Table of contents:**

Pages 2-7: optimized geometries and ro-vibrational parameters for various species,

Page 8: Table S1, collisional parameters used in master-equation simulation,

Pages 9-13: Table S2, rate constants for T=50-3500K from first-principles,

Pages 14-15: Table S3, energy state levels of the coupling of the 2D rotation and the electronic motion in CH,

Pages 16-18: Tables S4-S5, energies and ro-vibrational parameters for grid points along the minimum energy path for the association of CH and H<sub>2</sub>O leading to pre-reactive complex, PRC.

Pages 19-21: Table S6, energies and ro-vibrational parameters for grid points along the minimum energy path via TS1,

Page 21: Figure S1, IRC calculations via TS1,

Page 22: Figure S2, variational corrections via TS1,

Page 23: Figure S3, torsional energy potential in TS1,

Page 24: Figure S4, rate constants for three different kinetics models.

## Geometries and ro-vibrational parameters for various relevant species (optimized at fc-CCSD(T)/aug-cc-pVTZ)

### PRC (C<sub>1</sub>, X<sup>2</sup>A)

CH\_H2O

C

H 1 B1\*

O 1 B2\* 2 A1\*

H 3 B3\* 1 A2\* 2 D1\*

H 3 B4\* 1 A3\* 2 D2\*

B1 = 1.115370714217354  
B2 = 1.839497439991700  
A1 = 91.116842944595064  
B3 = 0.965394362954735  
A2 = 96.563008220913886  
D1 = -172.739909509340208  
B4 = 0.966897794432377  
A3 = 103.814717130473156  
D2 = 79.766818377709370

Harmonic vibrational frequencies (cm<sup>-1</sup>) calculated with CCSD(T)/aVTZ

151.3961  
341.2384  
584.6504  
622.1406  
1136.924  
1639.5719  
2877.6137  
3757.7486  
3859.8917

External rotational constants (cm<sup>-1</sup>)

A =5.87548  
B =0.62166  
C =0.59166

Anharmonic constants (cm<sup>-1</sup>) at CCSD(T)/aVDZ

|          |          |          |  |  |  |  |  |  |
|----------|----------|----------|--|--|--|--|--|--|
| -82.2157 |          |          |  |  |  |  |  |  |
| -12.8706 | -7.4088  |          |  |  |  |  |  |  |
| -4.1176  | -18.2309 | -12.1112 |  |  |  |  |  |  |

|          |          |          |          |          |          |          |           |          |
|----------|----------|----------|----------|----------|----------|----------|-----------|----------|
| -27.3888 | -22.1073 | -35.0092 | -19.9396 |          |          |          |           |          |
| -77.075  | -34.0612 | -26.5325 | -38.9710 | -34.0593 |          |          |           |          |
| 10.13    | 0.8005   | 7.2362   | 17.3444  | 1.0456   | -13.1257 |          |           |          |
| 27.5698  | 0.9636   | 1.2643   | 3.0212   | -6.5597  | -2.2912  | -72.3865 |           |          |
| -1.6357  | 1.5280   | -8.1791  | -3.6946  | 1.2622   | -20.4693 | -0.5628  | -46.2510  |          |
| -13.6121 | 1.4105   | -5.3222  | -8.2782  | -2.9764  | -25.8975 | 1.7975   | -168.8253 | -51.6533 |

## TS1 (C<sub>1</sub>, X<sup>2</sup>A)

TS1

C

H 1 B1\*

O 1 B2\* 2 A1\*

H 3 B3\* 1 A2\* 2 D1\*

H 3 B4\* 1 A3\* 2 D2\*

B1 = 1.096554067566681

B2 = 1.785805772565297

A1 = 97.752426758281459

B3 = 0.969520779015062

A2 = 100.625344863703319

D1 = -129.230939433929933

B4 = 1.141932165401778

A3 = 47.452978263753600

D2 = 136.524882512374290

Harmonic vibrational frequencies (cm<sup>-1</sup>)

1503.2756i

**(331.3324)**

506.7877

800.9299

1071.714

1365.8921

2244.2936

3068.8453

3761.5708

**Note:** Eigenvalues of the 1D Hindered Rotation mode (see Fig. S3) replace the torsional frequency of 331 cm<sup>-1</sup>

External rotational constants (cm<sup>-1</sup>)

A =6.38022  
 B =0.66967  
 C =0.64616

Anharmonic constants (cm<sup>-1</sup>) calculated with fc-CCSD(T)/aVTZ level of theory

|            |          |          |          |          |          |          |          |          |
|------------|----------|----------|----------|----------|----------|----------|----------|----------|
| -153.2556  |          |          |          |          |          |          |          |          |
| -40.3636i  | 17.4747  |          |          |          |          |          |          |          |
| 11.3649i   | -64.9378 | 16.0387  |          |          |          |          |          |          |
| 16.4897i   | 0.9410   | 5.1708   | -5.9393  |          |          |          |          |          |
| -0.6400i   | -16.4235 | -6.9867  | -15.5287 | -13.9594 |          |          |          |          |
| -35.2254i  | -37.4949 | -38.3725 | -25.7937 | -28.8313 | -23.6153 |          |          |          |
| -227.1695i | -9.5050  | 13.1666  | -13.3263 | -8.1187  | -18.2011 | -34.0760 |          |          |
| 22.9666i   | 3.7938   | 9.9473   | 5.0673   | -8.0479  | 5.3454   | -4.5517  | -64.2620 |          |
| -6.0473i   | -2.0579  | -3.3073  | -18.0450 | -1.9272  | -15.1733 | 1.2328   | -1.4341  | -81.7572 |

## CH<sub>2</sub>O (C<sub>2v</sub>, X<sup>1</sup>A<sub>1</sub>)

CH2O

O

C 1 R1\*

H 2 R2\* 1 A1\*

H 2 R2\* 1 A1\* 3 T180

R1 = 1.211515087382290

R2 = 1.103061904375071

A1 = 121.714028216910862

T180 = 180.000000000000000

Harmonic vibrational frequencies (cm<sup>-1</sup>)

1181.2346

1261.8602

1529.5951

1765.3231

2932.2521

3000.2530

Rotational  
 constants  
 (cm<sup>-1</sup>)

A =9.49832

B =1.28627

C = 1.13286

Anharmonic constants (cm<sup>-1</sup>)

|          |           |          |           |           |          |
|----------|-----------|----------|-----------|-----------|----------|
| -2.2616  |           |          |           |           |          |
| 6.9695   | -1.8298   |          |           |           |          |
| 0.3649   | -18.2100  | 0.5245   |           |           |          |
| -7.1521  | 94.5140   | -7.3284  | -9.5293   |           |          |
| -7.6579  | -8.1305   | -31.9415 | -2.3062   | -31.6632  |          |
| -19.2336 | -110.0806 | -12.9343 | -102.2618 | -130.4032 | -36.3678 |

**H<sub>2</sub>O (C<sub>2v</sub>, X<sup>1</sup>A<sub>1</sub>)**

H<sub>2</sub>O

O

H 1 R1\*

H 1 R1\* 2 A1\*

R1 = 0.961579640410436

A1 = 104.179636130297880

Harmonic vibrational frequencies (cm<sup>-1</sup>)

1645.9102

3810.8181

3919.9216

Rotational  
constants  
(cm<sup>-1</sup>)

A = 26.97851

B = 14.53063

C = 9.44406

Anharmonic constants (cm<sup>-1</sup>)

|          |           |          |
|----------|-----------|----------|
| -16.2447 |           |          |
| -15.2627 | -41.9580  |          |
| -19.9830 | -162.0977 | -47.7829 |

**CH (C<sub>∞v</sub>, X<sup>2</sup>Π)**

C  
H 1 B1

$$B1 = 1.121937531368334$$

Spectroscopic parameters

| Theory/Exptl  | B(2D) / $\text{cm}^{-1}$ | freq ( $\text{cm}^{-1}$ ) | Xii ( $\text{cm}^{-1}$ ) |
|---------------|--------------------------|---------------------------|--------------------------|
| CCSD(T)/aVTZ  | 14.40448                 | 2843.3353                 | -62.6919                 |
| Exptl. (NIST) | 14.457                   | 2858.5                    | -63.02                   |

and  $\Delta E_{AO}(CH) = 28 \text{ cm}^{-1}$

**Table S1:** Selected ceiling energy, angular momentum, and collisional parameters of van der Waals Complex of CH and H<sub>2</sub>O (PRC) with the bath gas, Air.

| Molecule / Parameter                                                                                                                          | Values                                                                                                                                                      |
|-----------------------------------------------------------------------------------------------------------------------------------------------|-------------------------------------------------------------------------------------------------------------------------------------------------------------|
| Complex (PRC): H <sub>2</sub> O---CH                                                                                                          | mass = 31.0 g/mol, $\sigma = 3.63 \text{ \AA}$ , and $\epsilon/k_B = 481.0 \text{ K}^{1, 2}$                                                                |
| Air                                                                                                                                           | mass = 28.8 g/mol, $\sigma = 3.688 \text{ \AA}$ , and $\epsilon/k_B = 86.2 \text{ K}^3$                                                                     |
| $E_{\text{max}}$ : maximum energy                                                                                                             | from 10,000 to 30,000 $\text{cm}^{-1}$                                                                                                                      |
| $\Delta E$ : energy grain                                                                                                                     | from 1 to 10 $\text{cm}^{-1}$                                                                                                                               |
| $J_{\text{max}}$ : maximum angular momentum                                                                                                   | from 100 to 200                                                                                                                                             |
| $\Delta J$ : step size of angular momentum                                                                                                    | from 1 to 5                                                                                                                                                 |
| $\langle \Delta E \rangle_d$ in $\text{cm}^{-1}$ : average amount of energy transferred per collision in a downward direction <sup>1, 2</sup> | $\langle \Delta E \rangle_{d=1} = 1 \times \left( \frac{T}{3} \right)^{0.76}$ $\langle \Delta E \rangle_{d=4} = 4 \times \left( \frac{T}{3} \right)^{0.76}$ |

1. E. E. Dames and D. M. Golden, *J Phys Chem A*, 2013, **117**, 7686-7696.
2. H. Hippler, F. Striebel and B. Viskolcz, *Phys Chem Chem Phys*, 2001, **3**, 2450-2458.
3. J. R. Barker, T. L. Nguyen, J. F. Stanton, C. Aieta, M. Ceotto, F. Gabas, T. J. D. Kumar, C. G. L. Li, L. L. Lohr, A. Maranzana, N. F. Ortiz, J. M. Preses, J. M. Simmie, J. A. Sonk and P. J. Stimac, *Multiwell software package*, Jan. 2021.

**Table S2:** Calculated rate constants (cm<sup>3</sup>/s) from first-principles for a wide temperature range between 50 K and 3500 K

| T (K) | 1000/T (1/K) | k(T,P=0) / cm <sup>3</sup> /s |
|-------|--------------|-------------------------------|
| 50    | 20           | 1.91498E-10                   |
| 52    | 19.23076923  | 1.85527E-10                   |
| 54    | 18.51851852  | 1.79759E-10                   |
| 56    | 17.85714286  | 1.74192E-10                   |
| 58    | 17.24137931  | 1.68825E-10                   |
| 60    | 16.66666667  | 1.63655E-10                   |
| 62    | 16.12903226  | 1.58678E-10                   |
| 64    | 15.625       | 1.53888E-10                   |
| 66    | 15.15151515  | 1.49281E-10                   |
| 68    | 14.70588235  | 1.4485E-10                    |
| 70    | 14.28571429  | 1.4059E-10                    |
| 72    | 13.88888889  | 1.36492E-10                   |
| 74    | 13.51351351  | 1.32554E-10                   |
| 76    | 13.15789474  | 1.28767E-10                   |
| 78    | 12.82051282  | 1.25127E-10                   |
| 80    | 12.5         | 1.21626E-10                   |
| 82    | 12.19512195  | 1.1826E-10                    |
| 84    | 11.9047619   | 1.15021E-10                   |
| 86    | 11.62790698  | 1.11905E-10                   |
| 88    | 11.36363636  | 1.08907E-10                   |
| 90    | 11.11111111  | 1.06021E-10                   |
| 92    | 10.86956522  | 1.03244E-10                   |
| 94    | 10.63829787  | 1.00569E-10                   |
| 96    | 10.41666667  | 9.79931E-11                   |
| 98    | 10.20408163  | 9.55109E-11                   |
| 100   | 10           | 9.31195E-11                   |
| 105   | 9.523809524  | 8.75088E-11                   |
| 110   | 9.090909091  | 8.23809E-11                   |
| 115   | 8.695652174  | 7.76869E-11                   |
| 120   | 8.333333333  | 7.33812E-11                   |
| 125   | 8            | 6.94252E-11                   |
| 130   | 7.692307692  | 6.57839E-11                   |
| 135   | 7.407407407  | 6.24263E-11                   |
| 140   | 7.142857143  | 5.93251E-11                   |



|     |             |             |
|-----|-------------|-------------|
| 145 | 6.896551724 | 5.64559E-11 |
| 150 | 6.666666667 | 5.37974E-11 |
| 155 | 6.451612903 | 5.133E-11   |
| 160 | 6.25        | 4.90367E-11 |
| 165 | 6.060606061 | 4.6902E-11  |
| 170 | 5.882352941 | 4.49118E-11 |
| 175 | 5.714285714 | 4.30544E-11 |
| 180 | 5.555555556 | 4.13182E-11 |
| 185 | 5.405405405 | 3.96935E-11 |
| 190 | 5.263157895 | 3.8171E-11  |
| 195 | 5.128205128 | 3.67426E-11 |
| 200 | 5           | 3.54011E-11 |
| 205 | 4.87804878  | 3.41397E-11 |
| 210 | 4.761904762 | 3.29523E-11 |
| 215 | 4.651162791 | 3.18336E-11 |
| 220 | 4.545454545 | 3.07784E-11 |
| 225 | 4.444444444 | 2.9782E-11  |
| 230 | 4.347826087 | 2.88404E-11 |
| 235 | 4.255319149 | 2.79498E-11 |
| 240 | 4.166666667 | 2.71067E-11 |
| 245 | 4.081632653 | 2.63077E-11 |
| 250 | 4           | 2.55502E-11 |
| 255 | 3.921568627 | 2.48311E-11 |
| 260 | 3.846153846 | 2.41482E-11 |
| 265 | 3.773584906 | 2.3499E-11  |
| 270 | 3.703703704 | 2.28814E-11 |
| 275 | 3.636363636 | 2.22937E-11 |
| 280 | 3.571428571 | 2.17338E-11 |
| 285 | 3.50877193  | 2.12E-11    |
| 290 | 3.448275862 | 2.0691E-11  |
| 295 | 3.389830508 | 2.02052E-11 |
| 300 | 3.333333333 | 1.97412E-11 |
| 325 | 3.076923077 | 1.77112E-11 |
| 350 | 2.857142857 | 1.60521E-11 |
| 375 | 2.666666667 | 1.47007E-11 |
| 400 | 2.5         | 1.35886E-11 |
| 425 | 2.352941176 | 1.26658E-11 |
| 450 | 2.222222222 | 1.18945E-11 |
| 475 | 2.105263158 | 1.12463E-11 |

|      |             |             |
|------|-------------|-------------|
| 500  | 2           | 1.06989E-11 |
| 525  | 1.904761905 | 1.02354E-11 |
| 550  | 1.818181818 | 9.84197E-12 |
| 575  | 1.739130435 | 9.50796E-12 |
| 600  | 1.666666667 | 9.22458E-12 |
| 625  | 1.6         | 8.98475E-12 |
| 650  | 1.538461538 | 8.78266E-12 |
| 675  | 1.481481481 | 8.61355E-12 |
| 700  | 1.428571429 | 8.47348E-12 |
| 725  | 1.379310345 | 8.35909E-12 |
| 750  | 1.333333333 | 8.26757E-12 |
| 775  | 1.290322581 | 8.19657E-12 |
| 800  | 1.25        | 8.14411E-12 |
| 825  | 1.212121212 | 8.1084E-12  |
| 850  | 1.176470588 | 8.08804E-12 |
| 875  | 1.142857143 | 8.08173E-12 |
| 900  | 1.111111111 | 8.08838E-12 |
| 925  | 1.081081081 | 8.10701E-12 |
| 950  | 1.052631579 | 8.13682E-12 |
| 975  | 1.025641026 | 8.17709E-12 |
| 1000 | 1           | 8.22718E-12 |
| 1025 | 0.975609756 | 8.28653E-12 |
| 1050 | 0.952380952 | 8.35471E-12 |
| 1075 | 0.930232558 | 8.43121E-12 |
| 1100 | 0.909090909 | 8.51574E-12 |
| 1125 | 0.888888889 | 8.60788E-12 |
| 1150 | 0.869565217 | 8.70744E-12 |
| 1175 | 0.85106383  | 8.81407E-12 |
| 1200 | 0.833333333 | 8.92763E-12 |
| 1225 | 0.816326531 | 9.04786E-12 |
| 1250 | 0.8         | 9.17464E-12 |
| 1275 | 0.784313725 | 9.30779E-12 |
| 1300 | 0.769230769 | 9.44719E-12 |
| 1325 | 0.754716981 | 9.59273E-12 |
| 1350 | 0.740740741 | 9.74422E-12 |
| 1375 | 0.727272727 | 9.90182E-12 |
| 1400 | 0.714285714 | 1.00652E-11 |
| 1425 | 0.701754386 | 1.02345E-11 |
| 1450 | 0.689655172 | 1.04095E-11 |

|      |             |             |
|------|-------------|-------------|
| 1475 | 0.677966102 | 1.05904E-11 |
| 1500 | 0.666666667 | 1.07769E-11 |
| 1525 | 0.655737705 | 1.09691E-11 |
| 1550 | 0.64516129  | 1.11671E-11 |
| 1575 | 0.634920635 | 1.13709E-11 |
| 1600 | 0.625       | 1.15803E-11 |
| 1625 | 0.615384615 | 1.17955E-11 |
| 1650 | 0.606060606 | 1.20165E-11 |
| 1675 | 0.597014925 | 1.22433E-11 |
| 1700 | 0.588235294 | 1.24758E-11 |
| 1725 | 0.579710145 | 1.27143E-11 |
| 1750 | 0.571428571 | 1.29587E-11 |
| 1775 | 0.563380282 | 1.3209E-11  |
| 1800 | 0.555555556 | 1.34655E-11 |
| 1825 | 0.547945205 | 1.37279E-11 |
| 1850 | 0.540540541 | 1.39966E-11 |
| 1875 | 0.533333333 | 1.42714E-11 |
| 1900 | 0.526315789 | 1.45525E-11 |
| 1925 | 0.519480519 | 1.484E-11   |
| 1950 | 0.512820513 | 1.51339E-11 |
| 1975 | 0.506329114 | 1.54343E-11 |
| 2000 | 0.5         | 1.57414E-11 |
| 2025 | 0.49382716  | 1.60552E-11 |
| 2050 | 0.487804878 | 1.63757E-11 |
| 2075 | 0.481927711 | 1.67031E-11 |
| 2100 | 0.476190476 | 1.70375E-11 |
| 2125 | 0.470588235 | 1.7379E-11  |
| 2150 | 0.465116279 | 1.77276E-11 |
| 2175 | 0.459770115 | 1.80835E-11 |
| 2200 | 0.454545455 | 1.84468E-11 |
| 2225 | 0.449438202 | 1.88174E-11 |
| 2250 | 0.444444444 | 1.91957E-11 |
| 2275 | 0.43956044  | 1.95817E-11 |
| 2300 | 0.434782609 | 1.99753E-11 |
| 2325 | 0.430107527 | 2.03769E-11 |
| 2350 | 0.425531915 | 2.07864E-11 |
| 2375 | 0.421052632 | 2.1204E-11  |
| 2400 | 0.416666667 | 2.16298E-11 |
| 2425 | 0.412371134 | 2.20638E-11 |

|      |             |             |
|------|-------------|-------------|
| 2450 | 0.408163265 | 2.2506E-11  |
| 2475 | 0.404040404 | 2.29569E-11 |
| 2500 | 0.4         | 2.34163E-11 |
| 2525 | 0.396039604 | 2.38843E-11 |
| 2550 | 0.392156863 | 2.43611E-11 |
| 2575 | 0.388349515 | 2.48466E-11 |
| 2600 | 0.384615385 | 2.5341E-11  |
| 2650 | 0.377358491 | 2.63569E-11 |
| 2700 | 0.37037037  | 2.74093E-11 |
| 2750 | 0.363636364 | 2.84987E-11 |
| 2800 | 0.357142857 | 2.96256E-11 |
| 2850 | 0.350877193 | 3.07904E-11 |
| 2900 | 0.344827586 | 3.19935E-11 |
| 2950 | 0.338983051 | 3.32349E-11 |
| 3000 | 0.333333333 | 3.4515E-11  |
| 3050 | 0.327868852 | 3.58336E-11 |
| 3100 | 0.322580645 | 3.71908E-11 |
| 3150 | 0.317460317 | 3.85861E-11 |
| 3200 | 0.3125      | 4.00196E-11 |
| 3250 | 0.307692308 | 4.14905E-11 |
| 3300 | 0.303030303 | 4.29986E-11 |
| 3350 | 0.298507463 | 4.45429E-11 |
| 3400 | 0.294117647 | 4.61229E-11 |
| 3450 | 0.289855072 | 4.77373E-11 |
| 3500 | 0.285714286 | 4.93853E-11 |

**Table S3:** Energy levels for the coupling of the 2D rotation and the electronic motion in CH, calculated using Hill and Van Vleck's formalism.

Rotational Zero-Energy Level= 5.45831 (cm<sup>-1</sup>)

| Index | n <sub>F1</sub> | F <sub>1</sub> (J=K+1/2) | n <sub>F2</sub> | F <sub>2</sub> (J=K-1/2) |
|-------|-----------------|--------------------------|-----------------|--------------------------|
| 1     | 8               | 0.00000                  | 4               | 22.99135                 |
| 2     | 12              | 60.32298                 | 8               | 75.76140                 |
| 3     | 16              | 148.37087                | 12              | 159.79816                |
| 4     | 20              | 264.58740                | 16              | 273.61033                |
| 5     | 24              | 409.07123                | 20              | 416.51054                |
| 6     | 28              | 581.76426                | 24              | 588.08697                |
| 7     | 32              | 782.51999                | 28              | 788.01488                |
| 8     | 36              | 1011.13098               | 32              | 1015.98841               |
| 9     | 40              | 1267.34120               | 36              | 1271.69297               |
| 10    | 44              | 1550.85196               | 40              | 1554.79300               |
| 11    | 48              | 1861.32509               | 44              | 1864.92599               |
| 12    | 52              | 2198.38467               | 48              | 2201.69930               |
| 13    | 56              | 2561.61806               | 52              | 2564.68847               |
| 14    | 60              | 2950.57650               | 56              | 2953.43614               |
| 15    | 64              | 3364.77555               | 60              | 3367.45145               |
| 16    | 68              | 3803.69534               | 64              | 3806.20964               |
| 17    | 72              | 4266.78072               | 68              | 4269.15180               |
| 18    | 76              | 4753.44140               | 72              | 4755.68467               |
| 19    | 80              | 5263.05202               | 76              | 5265.18055               |
| 20    | 84              | 5794.95224               | 80              | 5796.97717               |
| 21    | 88              | 6348.44676               | 84              | 6350.37770               |
| 22    | 92              | 6922.80535               | 88              | 6924.65064               |
| 23    | 96              | 7517.26290               | 92              | 7519.02980               |
| 24    | 100             | 8131.01940               | 96              | 8132.71430               |
| 25    | 104             | 8763.24001               | 100             | 8764.86854               |
| 26    | 108             | 9413.05502               | 104             | 9414.62218               |
| 27    | 112             | 10079.55988              | 108             | 10081.07012              |
| 28    | 116             | 10761.81520              | 112             | 10763.27252              |
| 29    | 120             | 11458.84678              | 116             | 11460.25474              |
| 30    | 124             | 12169.64557              | 120             | 12171.00742              |
| 31    | 128             | 12893.16772              | 124             | 12894.48638              |
| 32    | 132             | 13628.33455              | 128             | 13629.61268              |
| 33    | 136             | 14374.03259              | 132             | 14375.27259              |
| 34    | 140             | 15129.11352              | 136             | 15130.31761              |
| 35    | 144             | 15892.39423              | 140             | 15893.56443              |
| 36    | 148             | 16662.65681              | 144             | 16663.79496              |
| 37    | 152             | 17438.64851              | 148             | 17439.75634              |
| 38    | 156             | 18219.08181              | 152             | 18220.16088              |
| 39    | 160             | 19002.63436              | 156             | 19003.68613              |
| 40    | 164             | 19787.94902              | 160             | 19788.97483              |
| 41    | 168             | 20573.63382              | 164             | 20574.63493              |
| 42    | 172             | 21358.26201              | 168             | 21359.23958              |
| 43    | 176             | 22140.37203              | 172             | 22141.32714              |

|    |     |             |     |             |
|----|-----|-------------|-----|-------------|
| 44 | 180 | 22918.46751 | 176 | 22919.40117 |
| 45 | 184 | 23691.01729 | 180 | 23691.93043 |
| 46 | 188 | 24456.45539 | 184 | 24457.34891 |
| 47 | 192 | 25213.18104 | 188 | 25214.05575 |
| 48 | 196 | 25959.55867 | 192 | 25960.41535 |
| 49 | 200 | 26693.91789 | 196 | 26694.75728 |
| 50 | 204 | 27414.55353 | 200 | 27415.37630 |

**Table S4:** Ro-vibrational parameters for grid points calculated along the reaction coordinate of the barrier-less association of CH and H<sub>2</sub>O.

| HC-OH <sub>2</sub> =3 Å | 3.1 Å     | 3.2 Å     | 3.3 Å     | 3.4 Å     | 3.5 Å     | 3.6 Å     | 3.7 Å     | 3.8 Å     | 3.9 Å     |
|-------------------------|-----------|-----------|-----------|-----------|-----------|-----------|-----------|-----------|-----------|
| 76.7504                 | 74.1245   | 70.8000   | 70.2423   | 76.4689   | 73.6544   | 66.7191   | 67.7378   | 66.6701   | 65.1468   |
| 161.0056                | 141.9389  | 125.3327  | 111.0430  | 97.9966   | 84.6367   | 76.2831   | 67.8510   | 71.7809   | 71.2491   |
| 173.4826                | 158.9712  | 147.3800  | 135.6529  | 126.9398  | 118.5733  | 110.4205  | 105.8534  | 119.7897  | 119.0828  |
| 338.6108                | 304.7243  | 274.2258  | 246.4668  | 220.4794  | 194.9028  | 166.4939  | 218.9887  | 212.9114  | 206.0997  |
| 1647.6367               | 1647.3546 | 1646.8299 | 1646.0359 | 1644.8510 | 1643.0791 | 1640.1110 | 1618.5004 | 1618.3952 | 1618.4787 |
| 2863.1967               | 2860.4219 | 2857.6940 | 2854.8834 | 2851.7550 | 2847.9275 | 2842.2585 | 2803.1407 | 2794.8878 | 2789.0779 |
| 3800.1104               | 3801.6735 | 3802.7737 | 3803.3623 | 3803.3646 | 3802.5779 | 3800.4301 | 3780.4169 | 3780.8345 | 3781.2149 |
| 3906.8261               | 3908.9948 | 3910.8707 | 3912.5522 | 3913.9925 | 3915.2119 | 3916.3501 | 3917.9586 | 3918.4311 | 3918.6898 |
| A= 5.78096              | 5.81787   | 5.87470   | 5.96008   | 6.09121   | 6.30445   | 6.71907   | 14.49973  | 14.50304  | 14.50839  |
| B=0.24470               | 0.22933   | 0.21529   | 0.20247   | 0.19075   | 0.18000   | 0.17011   | 0.16204   | 0.15372   | 0.14602   |
| C=0.24261               | 0.22754   | 0.21379   | 0.20124   | 0.18979   | 0.17933   | 0.16979   | 0.16025   | 0.15211   | 0.14456   |

**Continued**

| 4.0 Å      | 4.5 Å     | 5.0 Å     | 5.5 Å     | 6.0 Å     | 6.5 Å     | 7.0 Å     | 7.5 Å     | 8.0 Å     | 8.5 Å     |
|------------|-----------|-----------|-----------|-----------|-----------|-----------|-----------|-----------|-----------|
| 57.8479    | 51.9207   | 50.5289   | 46.8134   | 40.4720   | 35.2596   | 31.1672   | 28.0342   | 25.1329   | 22.8139   |
| 71.9842    | 63.2478   | 54.5334   | 47.3388   | 42.3497   | 37.3431   | 32.8901   | 29.2341   | 26.6537   | 24.6526   |
| 122.6404   | 104.1179  | 84.0054   | 70.0782   | 60.6149   | 54.2085   | 49.1758   | 45.1478   | 41.8225   | 38.9474   |
| 199.2420   | 158.6000  | 126.9869  | 104.1054  | 87.2590   | 74.5536   | 64.7586   | 57.0770   | 50.9205   | 45.8812   |
| 1618.2132  | 1618.0406 | 1618.1760 | 1618.1209 | 1617.9995 | 1617.8822 | 1617.7924 | 1617.7156 | 1617.6384 | 1617.5725 |
| 2791.1023  | 2784.6341 | 2784.1677 | 2783.7995 | 2783.2137 | 2782.6045 | 2782.0345 | 2781.5440 | 2781.1045 | 2780.7282 |
| 3781.3866  | 3781.7191 | 3781.6483 | 3781.5699 | 3781.5330 | 3781.5180 | 3781.5090 | 3781.5030 | 3781.4986 | 3781.4969 |
| 3919.0140  | 3919.3830 | 3919.3919 | 3919.4073 | 3919.4513 | 3919.4995 | 3919.5437 | 3919.5876 | 3919.6250 | 3919.6593 |
| A=14.50899 | 14.52034  | 14.52697  | 14.53010  | 14.53156  | 14.53221  | 14.53251  | 14.53258  | 14.53251  | 14.53240  |
| B=0.13888  | 0.10994   | 0.08917   | 0.07376   | 0.06202   | 0.05287   | 0.04560   | 0.03973   | 0.03493   | 0.03094   |
| C=0.13756  | 0.10912   | 0.08863   | 0.07339   | 0.06175   | 0.05268   | 0.04546   | 0.03962   | 0.03484   | 0.03088   |

**Continued**

| <b>9.0 Å</b> | <b>9.5 Å</b> | <b>10.0 Å</b> | <b>10.5 Å</b> | <b>11.0 Å</b> | <b>11.5 Å</b> | <b>12.0 Å</b> |
|--------------|--------------|---------------|---------------|---------------|---------------|---------------|
|              |              |               |               |               |               |               |
| 21.0163      | 19.3548      | 17.9569       | 16.6897       | 15.6091       | 14.6412       | 13.7678       |
| 22.9963      | 21.5819      | 20.1755       | 20.4564       | 19.4853       | 18.6863       | 18.0512       |
| 36.4079      | 34.2157      | 32.0580       | 30.6490       | 29.0082       | 27.5309       | 25.9788       |
| 41.6897      | 38.0844      | 34.9707       | 32.2579       | 29.9003       | 27.8203       | 26.2588       |
| 1617.5180    | 1617.4755    | 1617.4335     | 1617.3998     | 1617.3727     | 1617.3497     | 1617.3300     |
| 2780.4116    | 2780.1494    | 2779.9324     | 2779.7505     | 2779.6002     | 2779.4720     | 2779.3639     |
| 3781.4962    | 3781.4977    | 3781.4986     | 3781.5004     | 3781.5026     | 3781.5044     | 3781.5060     |
| 3919.6900    | 3919.7138    | 3919.7384     | 3919.7590     | 3919.7758     | 3919.7906     | 3919.8034     |
|              |              |               |               |               |               |               |
| 14.53227     | 14.53221     | 14.53201      | 14.53189      | 14.53178      | 14.53168      | 14.53159      |
| 0.02760      | 0.02477      | 0.02236       | 0.02028       | 0.01848       | 0.01691       | 0.01553       |
| 0.02755      | 0.02473      | 0.02232       | 0.02025       | 0.01846       | 0.01689       | 0.01551       |

**Continued**

| <b>12.5 Å</b> | <b>13.0 Å</b> | <b>13.5 Å</b> | <b>14.0 Å</b> | <b>14.5 Å</b> | <b>15.0 Å</b> |
|---------------|---------------|---------------|---------------|---------------|---------------|
|               |               |               |               |               |               |
| 12.9875       | 12.3678       | 11.3420       | 10.7400       | 10.2035       | 9.8966        |
| 17.3889       | 16.8174       | 16.3426       | 15.8934       | 15.4455       | 15.0075       |
| 24.3275       | 22.8854       | 21.5011       | 20.2912       | 19.2001       | 18.2546       |
| 25.0529       | 23.9926       | 23.0745       | 22.2611       | 21.5175       | 20.8390       |
| 1617.3133     | 1617.2991     | 1617.2855     | 1617.2744     | 1617.2646     | 1617.2560     |
| 2779.2707     | 2779.1913     | 2779.1219     | 2779.0620     | 2779.0107     | 2778.9648     |
| 3781.5073     | 3781.5085     | 3781.5088     | 3781.5099     | 3781.5109     | 3781.5119     |
| 3919.8146     | 3919.8243     | 3919.8303     | 3919.8382     | 3919.8451     | 3919.8526     |
|               |               |               |               |               |               |
| 14.53152      | 14.53144      | 14.53138      | 14.53132      | 14.53127      | 14.53122      |
| 0.01431       | 0.01323       | 0.01227       | 0.01141       | 0.01063       | 0.00994       |
| 0.01430       | 0.01322       | 0.01226       | 0.01140       | 0.01063       | 0.00993       |



**Table S5:** Calculated energies of grid points (relative to PRC) on the minimum energy path for the association of CH and H<sub>2</sub>O

| HC-----OH <sub>2</sub> (Å) | Energy (in kcal/mol) relative to PRC |
|----------------------------|--------------------------------------|
| 3                          | 6.3559                               |
| 3.1                        | 6.7072                               |
| 3.2                        | 7.0082                               |
| 3.3                        | 7.2634                               |
| 3.4                        | 7.4881                               |
| 3.5                        | 7.6527                               |
| 3.6                        | 7.7716                               |
| 3.7                        | 7.8115                               |
| 3.8                        | 7.8930                               |
| 3.9                        | 7.9663                               |
| 4                          | 8.0349                               |
| 4.5                        | 8.3936                               |
| 5                          | 8.6237                               |
| 5.5                        | 8.7526                               |
| 6                          | 8.8240                               |
| 6.5                        | 8.8656                               |
| 7                          | 8.8906                               |
| 7.5                        | 8.9065                               |
| 8                          | 8.9167                               |
| 8.5                        | 8.9232                               |
| 9                          | 8.9275                               |
| 9.5                        | 8.9296                               |
| 10                         | 8.9300                               |
| 10.5                       | 8.9325                               |
| 11                         | 8.9318                               |
| 11.5                       | 8.9309                               |
| 12                         | 8.9298                               |
| 12.5                       | 8.9284                               |
| 13                         | 8.9271                               |
| 13.5                       | 8.9251                               |
| 14                         | 8.9237                               |
| 14.5                       | 8.9222                               |
| 15                         | 8.9210                               |

**Table S6:** Calculated relative energies (kcal/mol) and ro-vibrational parameters on the reaction coordinate via TS1

|                    | F-100     | F-90      | F-80      | F-70      | F-60      | F-50      | F-45      |
|--------------------|-----------|-----------|-----------|-----------|-----------|-----------|-----------|
| Vib (cm-1)         | 149.8397  | 163.3432  | 178.7122  | 195.3851  | 215.7027  | 240.4922  | 253.8537  |
| Vib                | 376.7852  | 378.0980  | 381.6681  | 386.7910  | 395.0044  | 407.5858  | 416.3058  |
| Vib                | 659.1747  | 669.7250  | 681.2971  | 693.4032  | 706.2745  | 719.9529  | 727.0538  |
| Vib                | 1072.5006 | 1073.2611 | 1074.3833 | 1075.4895 | 1076.9048 | 1078.9249 | 1080.0282 |
| Vib                | 1624.1259 | 1617.1754 | 1608.6763 | 1598.5956 | 1586.3979 | 1571.6085 | 1562.9715 |
| Vib                | 2886.9282 | 2895.6453 | 2905.2873 | 2915.9095 | 2927.5613 | 2940.3031 | 2946.9396 |
| Vib                | 3668.0773 | 3604.0961 | 3520.6628 | 3416.3608 | 3287.1265 | 3128.8019 | 3039.2177 |
| Vib                | 3840.6780 | 3836.2339 | 3832.3909 | 3828.8290 | 3825.3220 | 3821.8145 | 3820.0980 |
|                    |           |           |           |           |           |           |           |
| A (cm-1)           | 5.9293    | 5.9805    | 6.0371    | 6.0980    | 6.1613    | 6.2242    | 6.2544    |
| B                  | 0.6275    | 0.6321    | 0.6369    | 0.6419    | 0.6471    | 0.6524    | 0.6551    |
| C                  | 0.6109    | 0.6146    | 0.6186    | 0.6227    | 0.6269    | 0.6313    | 0.6334    |
|                    |           |           |           |           |           |           |           |
| Va + 8.93 kcal/mol | 1.1416    | 1.7813    | 2.4722    | 3.2015    | 3.9588    | 4.7268    | 5.1084    |

| F-40      | F-35      | F-30      | F-25      | F-20      | F-15      | F-10      | F-9       | F-8       |
|-----------|-----------|-----------|-----------|-----------|-----------|-----------|-----------|-----------|
| 267.4910  | 281.6948  | 296.4842  | 311.8277  | 328.1213  | 345.4524  | 363.0429  | 366.4472  | 369.8289  |
| 426.8468  | 438.9117  | 451.6051  | 464.3693  | 477.8658  | 491.8026  | 504.3934  | 506.6178  | 508.7459  |
| 734.4063  | 742.0227  | 749.9690  | 758.3476  | 767.2446  | 776.6266  | 786.4887  | 788.5265  | 790.6572  |
| 1081.2391 | 1082.6636 | 1084.3088 | 1086.0524 | 1087.7612 | 1089.2658 | 1090.3082 | 1090.4405 | 1090.5467 |
| 1553.1761 | 1541.9201 | 1528.8241 | 1513.5164 | 1495.8070 | 1475.4989 | 1452.2436 | 1447.2289 | 1442.1139 |
| 2938.0298 | 2838.7280 | 2731.8276 | 2623.7766 | 2520.9315 | 2429.3625 | 2353.1256 | 2339.9476 | 2327.4754 |
| 2958.9115 | 2963.3611 | 2971.2300 | 2979.5809 | 2988.2242 | 2997.0973 | 3006.1248 | 3007.9422 | 3009.7634 |
| 3818.4029 | 3816.7325 | 3815.1159 | 3813.5705 | 3812.1189 | 3810.8179 | 3809.6275 | 3809.3802 | 3808.9689 |
|           |           |           |           |           |           |           |           |           |
| 6.2830    | 6.3091    | 6.3318    | 6.3505    | 6.3644    | 6.3732    | 6.3768    | 6.3770    | 6.3768    |
| 0.6578    | 0.6605    | 0.6631    | 0.6656    | 0.6680    | 0.6703    | 0.6724    | 0.6729    | 0.6733    |
| 0.6356    | 0.6378    | 0.6399    | 0.6420    | 0.6440    | 0.6459    | 0.6477    | 0.6480    | 0.6483    |
|           |           |           |           |           |           |           |           |           |
| 5.4836    | 5.8481    | 6.1954    | 6.5199    | 6.8189    | 7.0850    | 7.3010    | 7.3363    | 7.3683    |

| F-7      | F-6      | F-5      | F-4      | F-3      | F-2      | F-1      | TS1      | R-1      |
|----------|----------|----------|----------|----------|----------|----------|----------|----------|
| 372.7481 | 376.0881 | 378.9019 | 381.7904 | 384.4255 | 387.0088 | 389.3451 | 391.7986 | 394.0069 |
| 510.7337 | 512.7063 | 514.5586 | 516.3733 | 518.1172 | 519.8192 | 521.4401 | 523.1010 | 524.6255 |
| 792.3735 | 794.7569 | 796.6808 | 798.8537 | 800.7847 | 803.2171 | 805.0505 | 807.5044 | 809.7040 |

|           |           |           |           |           |           |           |           |           |
|-----------|-----------|-----------|-----------|-----------|-----------|-----------|-----------|-----------|
| 1090.6152 | 1090.6806 | 1090.7030 | 1090.7065 | 1090.7309 | 1090.5753 | 1090.5459 | 1090.4891 | 1090.3228 |
| 1436.8246 | 1431.5403 | 1426.0743 | 1420.5502 | 1414.8938 | 1409.2145 | 1403.3795 | 1397.1307 | 1390.6986 |
| 2316.1363 | 2305.2429 | 2295.4158 | 2286.0868 | 2277.7173 | 2268.9423 | 2262.9737 | 2256.5399 | 2250.8664 |
| 3011.5925 | 3013.4170 | 3015.2510 | 3017.0777 | 3018.6192 | 3020.6769 | 3022.5275 | 3024.5229 | 3026.4748 |
| 3809.2934 | 3808.5790 | 3808.7111 | 3808.3956 | 3808.2827 | 3807.3832 | 3807.9627 | 3807.8228 | 3807.6318 |
|           |           |           |           |           |           |           |           |           |
| 6.3769    | 6.3763    | 6.3759    | 6.3751    | 6.3742    | 6.3727    | 6.3718    | 6.3702    | 6.3685    |
| 0.6737    | 0.6741    | 0.6745    | 0.6749    | 0.6753    | 0.6756    | 0.6760    | 0.6764    | 0.6768    |
| 0.6487    | 0.6490    | 0.6493    | 0.6497    | 0.6500    | 0.6503    | 0.6506    | 0.6509    | 0.6513    |
|           |           |           |           |           |           |           |           |           |
| 7.3976    | 7.4234    | 7.4461    | 7.4647    | 7.4793    | 7.4880    | 7.4968    | 7.5000    | 7.4969    |

| R-2       | R-3       | R-4       | R-5       | R-6       | R-7       | R-8       | R-9       | R-10      |
|-----------|-----------|-----------|-----------|-----------|-----------|-----------|-----------|-----------|
| 395.9948  | 397.7741  | 399.5502  | 401.1415  | 402.8174  | 404.2613  | 406.0476  | 407.5184  | 409.5171  |
| 525.9291  | 527.0606  | 528.0409  | 528.8560  | 529.5638  | 530.1781  | 530.8458  | 531.5223  | 532.4186  |
| 812.1763  | 814.0825  | 816.4338  | 818.5756  | 820.8561  | 822.9154  | 825.3075  | 827.2975  | 829.7621  |
| 1090.1488 | 1090.0692 | 1089.8121 | 1089.5531 | 1089.2623 | 1088.9195 | 1088.5779 | 1088.1820 | 1087.8037 |
| 1384.7525 | 1378.6229 | 1372.4865 | 1366.2361 | 1359.9509 | 1353.5745 | 1347.2410 | 1340.8195 | 1334.5153 |
| 2245.6666 | 2242.8222 | 2239.6752 | 2237.3066 | 2235.4031 | 2234.2430 | 2233.6249 | 2233.6098 | 2234.1412 |
| 3028.2994 | 3029.9058 | 3031.9650 | 3033.7989 | 3035.6013 | 3037.4434 | 3039.2349 | 3041.0628 | 3042.8661 |
| 3806.8570 | 3807.3846 | 3807.1570 | 3807.1216 | 3806.8277 | 3806.9801 | 3806.4864 | 3806.8317 | 3806.2331 |
|           |           |           |           |           |           |           |           |           |
| 6.3665    | 6.3649    | 6.3628    | 6.3607    | 6.3582    | 6.3559    | 6.3532    | 6.3506    | 6.3477    |
| 0.6771    | 0.6775    | 0.6778    | 0.6782    | 0.6785    | 0.6788    | 0.6792    | 0.6795    | 0.6798    |
| 0.6516    | 0.6519    | 0.6521    | 0.6524    | 0.6527    | 0.6530    | 0.6533    | 0.6535    | 0.6538    |
|           |           |           |           |           |           |           |           |           |
| 7.4880    | 7.4776    | 7.4605    | 7.4379    | 7.4096    | 7.3763    | 7.3377    | 7.2939    | 7.2450    |

| R-15      | R20       | R-25      | R-30      | R-35      | R-40      | R-45      | R-50      | R-60      |
|-----------|-----------|-----------|-----------|-----------|-----------|-----------|-----------|-----------|
| 419.7329  | 428.8663  | 431.9983  | 429.5998  | 425.9008  | 419.8549  | 408.4611  | 391.6051  | 343.1087  |
| 539.9182  | 549.7501  | 554.6494  | 555.9468  | 561.9881  | 572.3964  | 583.0158  | 593.7885  | 612.3726  |
| 840.8897  | 852.0153  | 862.6944  | 873.0107  | 882.9040  | 891.8986  | 899.4455  | 905.1475  | 911.1235  |
| 1085.7754 | 1083.4506 | 1080.2297 | 1076.7279 | 1073.9538 | 1071.1998 | 1068.1472 | 1065.9866 | 1064.7557 |
| 1303.6473 | 1274.4406 | 1245.4549 | 1217.1442 | 1192.0939 | 1171.9303 | 1155.8883 | 1142.0178 | 1118.1997 |
| 2244.4311 | 2265.3479 | 2294.2175 | 2330.5520 | 2373.7252 | 2421.1126 | 2471.0378 | 2522.9223 | 2627.4724 |
| 3051.9043 | 3060.9600 | 3069.9960 | 3079.0628 | 3088.1816 | 3097.3462 | 3106.5326 | 3115.7762 | 3134.4162 |
| 3806.0476 | 3805.7342 | 3805.5225 | 3805.4234 | 3805.4008 | 3805.4634 | 3805.5857 | 3805.7466 | 3806.3472 |
|           |           |           |           |           |           |           |           |           |
| 6.3321    | 6.3141    | 6.2941    | 6.2725    | 6.2496    | 6.2254    | 6.2002    | 6.1741    | 6.1199    |

|        |        |        |        |        |        |        |        |         |
|--------|--------|--------|--------|--------|--------|--------|--------|---------|
| 0.6813 | 0.6828 | 0.6842 | 0.6855 | 0.6868 | 0.6881 | 0.6894 | 0.6906 | 0.6932  |
| 0.6551 | 0.6563 | 0.6574 | 0.6586 | 0.6597 | 0.6607 | 0.6618 | 0.6628 | 0.6650  |
|        |        |        |        |        |        |        |        |         |
| 6.9221 | 6.4487 | 5.8120 | 5.1455 | 4.3271 | 3.3463 | 2.2045 | 0.9149 | -2.0610 |

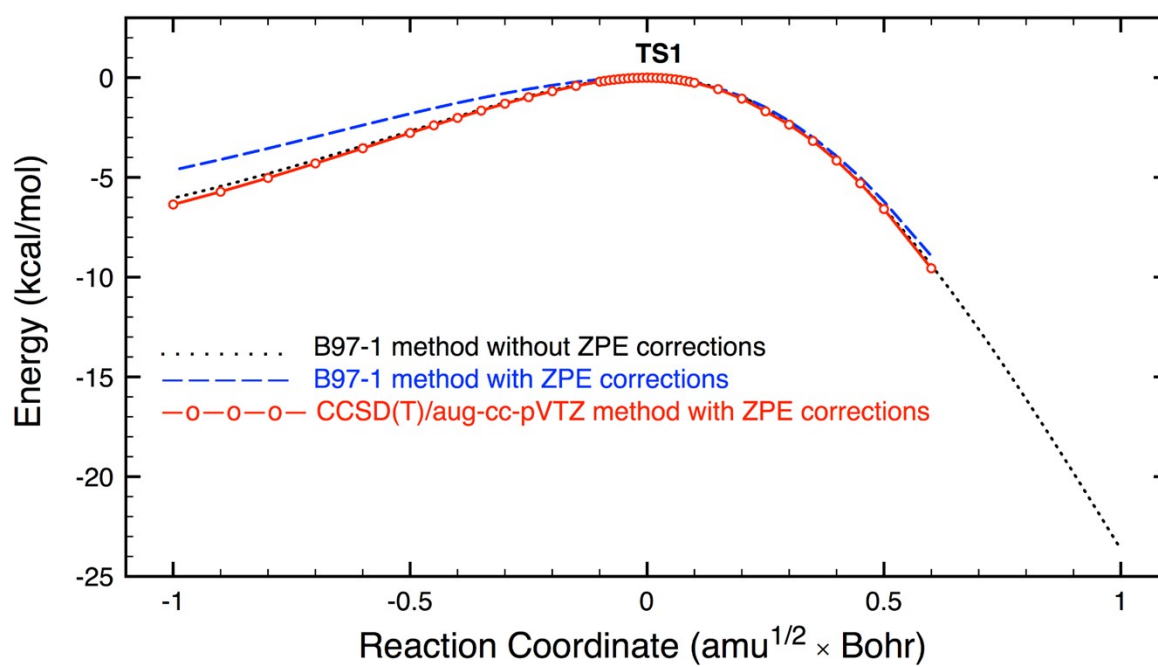

**Figure S1:** IRC calculations via TS1 using B97-1/6-311G(d,p) and CCSD(T)/aug-cc-pVTZ level of theory.

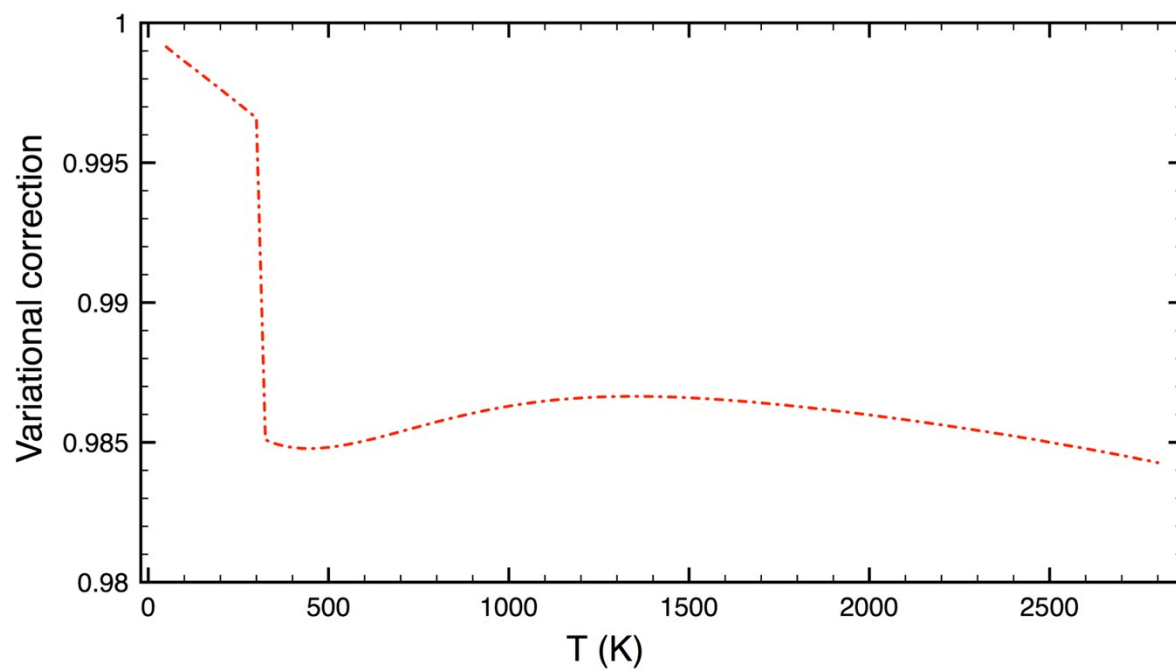

**Figure S2:** Calculated variational correction that is defined as a ratio of rate constants with and without variational treatments.

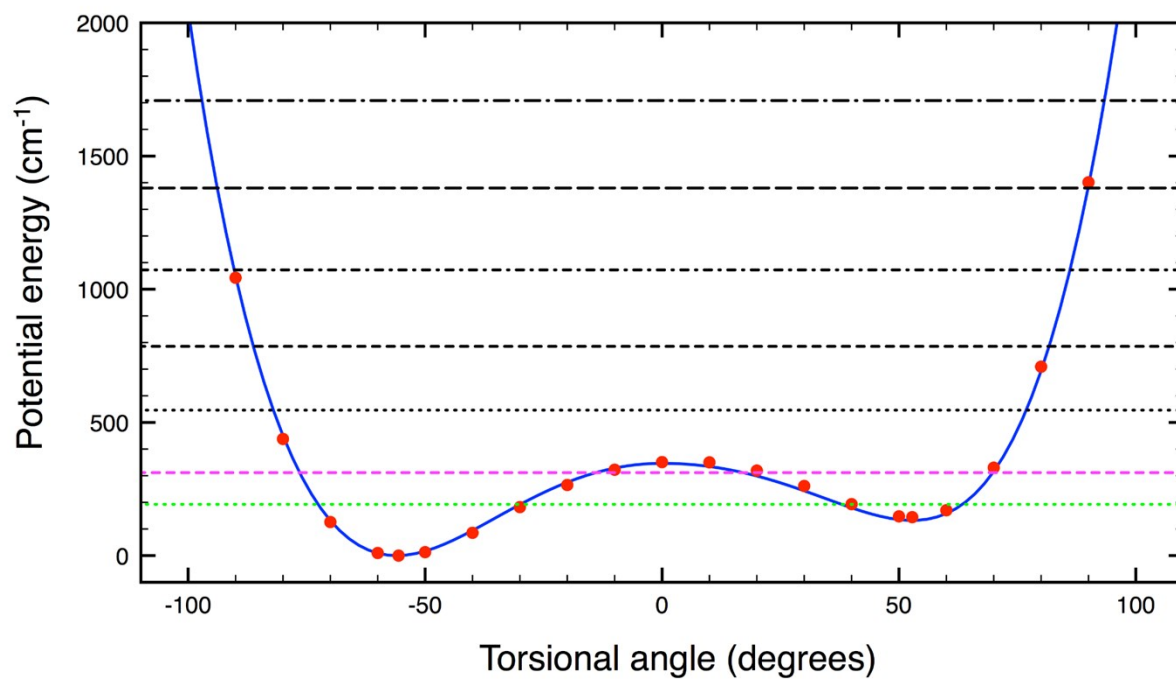

**Figure S3:** Calculated hindered internal rotation (1DHR) potential in TS1 using CCSD(T)/aug-cc-pVTZ level of theory. Dash- and dotted-lines are low-lying eigenvalues.

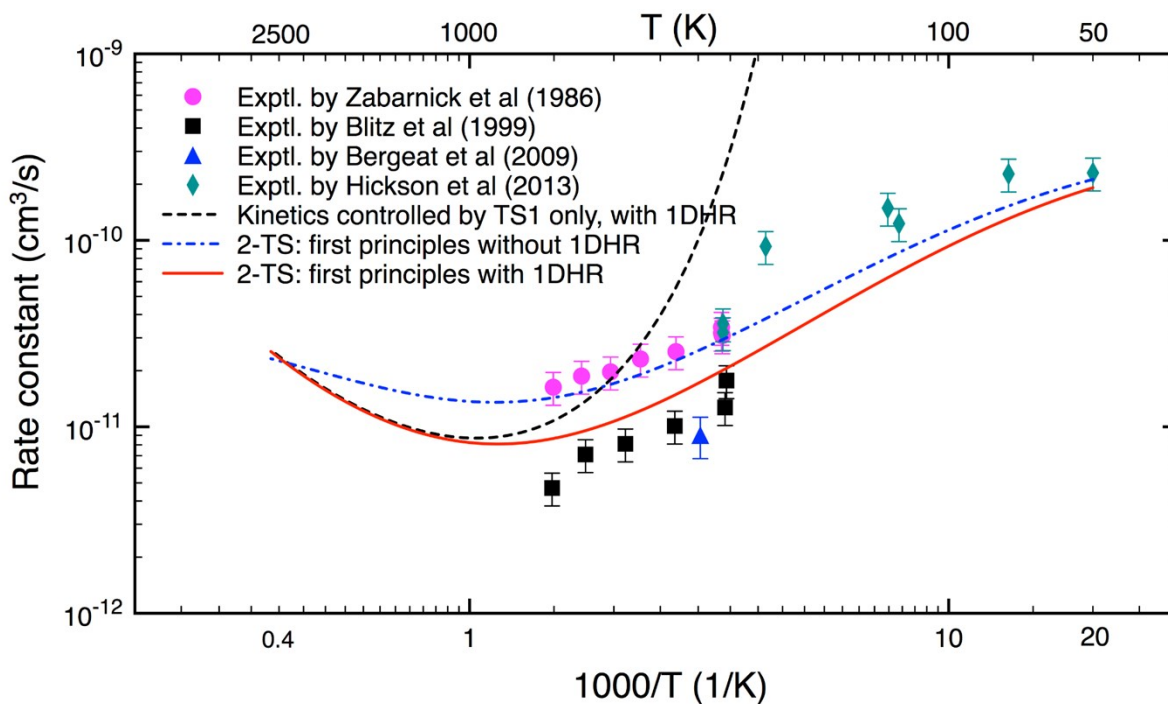

**Figure S4:** Calculated rate constants (cm<sup>3</sup>/s) at the Low-Pressure Limit,  $k(T,P=0)$ , using three different kinetics models, namely: (1) Hypothetical kinetics controlled by TS1 only, with 1DHR; (2) two-TS kinetics model without 1DHR treatment (i.e. the two minima of the 1DHR potential for TS1 are considered as separated transition state conformers); (3) two-TS kinetics model with 1DHR treatment.
